# Supplementary material for: ApicoAlign: an alignment and sequence search tool for apicomplexan proteins
Source: PubMed Central journal article supplement (PMC3333189; doi:10.1186/1471-2164-12-s3-s6), 2011-11-30
Supplement: 1471-2164-12-S3-S6-S10.pdf [file 1471-2164-12-S3-S6-S10.pdf]

(a)

```
        610        620        630        640        650        660
PF11_0 MERGEQKQNKKKIYNNNNINSHNNNSCNSNIIQKNETKFSESKGNNKNNKFKSEDSNKLEE
          : : : : : : : : : : : : : : : : : : : : : :
632252 LQHVSPQLLATHDLELAVPGTYFPGKPTIRIAKFEPLFSVISSKQRPKRKFSIKGSDG--K
        2060        2070        2080        2090        2100        2110
```

```
        670        680        690        700        710        720
PF11_0 NYNIFLKKIKEINYNTLKKSFYNFVYPMFKNENIYNFSEHIMHKRNKKCPVEHIKQHMEN
          . : . : . : . : . : . : . : . : . : . : . : . : . : . : . :
632252 DYKYVLKGHEDIRQDSLVMQLFGLVNTLLKNDS-ECFKRHLDIQQYPAIPLSPKSGLLGW
        2120        2130        2140        2150        2160        2170
```

(b)

```
                                10        20        30
PF11_0                                MSKSLKLMEDKNLEKNAVEAFKQKMEKKKQ
          . : : : : : : : : : : : : : : : : : : : : :
632252 IAYENHKAKMIREKIYQIVPLLASFNPQLFAGKYLHQIMDNYLEIL-TNAPANKIPLKLD
        350        360        370        380        390        400
```

```
                40        50                60                70
PF11_0 EYLRFNLSRNGENMKEGDEKKK-----EIDINNNHNFN-----INNHHVND
          . . . : . . . : . . . : : : : : : : : : : : : : : : . : . :
632252 DKPQILISIGDIAEYVGPDIAPYVKQILDYIEHDLQTKFKFRKFFENEIFYCIGRLAVPL
        410        420        430        440        450        460
```

```
                80                90        100        110        120
PF11_0 KHINNKYINNYMNNRHK-----NIHVNDHINNIHVS--NNHINNIHVSNNHINN
          . : : : . . . : . . . : . . . : . : . : . : . : . : . :
632252 GPVLGKLLNRNILDLMFKCPLSDYMQETFQILTERIPSLGPKINDELLNL-VCSTLSGTP
        470        480        490        500        510        520
```

```
                130        140        150        160        170
PF11_0 HIKNNNDINRKNSNRHKNRKVVIETYDYDKYILNMYDEENEIYED-----EINR--EN
          : : : : . . : : : : . . : : : : : : : : . : : : . : : :
632252 FIQPGSPMEIPSFSRERAR-----EWRNKNILQKTGESNDDNNDIKIIIQAFRMLKN
        530        540                550        560        570
```

```
                180                190        200        210        220
PF11_0 VESRTPNEGMEFNRI-----EKREENIFIPLKILSNKYDFNDLVEATNMFSEYNRIAKG
          . : : . . : : : : : : . . . : . . : . . : . . : . . : . .
632252 IKSRFSL--VEFVRIVALSYIEHTDPRVRKLAALTSCEIYVKDNICKQTSLHSLNTVSEV
        580        590        600        610        620        630
```

```
                230        240        250        260        270
PF11_0 GNGTVYKGVLKNCINVAIKVLKKNENNGFENEIIMSRYR-----HN---NILS----L
          . . . . . : : : : : : : : : : . : : : : : : : : : : : :
632252 LSKLLAITIADPLQDIRLEVLK-NLNPCFDPQLAQPDLRLLFTALHDESFNIQSVAMEL
        640        650        660        670        680        690
```

```
                280        290        300        310        320
PF11_0 LGYATNKNFYLIYEVNLDLRLTLLFNHYYYNSKNKE-----NPELSYNYNI
          . : . . : : : : . . : : . . : : : : . . . . :
632252 VGRLSSVNPAYVIPSIRKI--LLELLTKLKFSTSSREKEETASLLCTLIRSSKDVAKPYI
        700        710        720        730        740
```





```

      :..  ..:..  :.  :...  ::  .  :..  ::  :...
632252  SGLSLTINGNRYPLELIQRHVVPAIKGFFHSISLLETSCLODTLRLLLTLLFNFGGIKEVSQ
      1800      1810      1820      1830      1840      1850

              1320      1330      1340
PF11_0  NNKEN-----ISKNLNLRKLNHNDI-QKEKDVNN-----IK
      ..  :.  :..  ::  :  :.  :.  :...:..  :.  :.
632252  AMYEGFNLMKIENWLEVLPLQLISRIHQPDPTVSNLSLLSLLSDLGKAHPQALVYPLTVAIK
      1860      1870      1880      1890      1900      1910

              1350      1360      1370      1380      1390
PF11_0  ETDEDTYCNSSLLRDYNIHKKNMNNNDLLSDDNFMMSP-----YDNIND-THILYIS
      ...  ...  .  :..  .  :...  .  :.  :...  .  .  :...:  :...
632252  SESVSRQKAALSII EKIRIHSPVLVNQAELVSHELIRVAVLWHELWYEGLEDASRQFFVE
      1920      1930      1940      1950      1960      1970

              1400      1410      1420      1430      1440
PF11_0  NFN--FINLEN-NKNI-NDSNTCA--WFNKNVFEVLIDEHKFFSS-----VTFLDILY
      .  .  :  :..  :...  :...:..  :...  .  :  :...:..  .  :...
632252  HNIEKMFSTLEPLHKHLGNEPQTLSEVSFQKSFGRDLNDAYEWLNNYKSKDINNLNQAW
      1980      1990      2000      2010      2020      2030

              1450      1460      1470      1480
PF11_0  E--FNVFN-VKRD-----GHV----FIEHDNEYVLQGWCDYDPNKNNSTSVNFEE
      .  :...:  :...  :.  :...:  :...:..  :  :...:  .  :...:
632252  DIYYNVFRKITRQIPQLQTLDLQHVSPQLLATHDLELAVPGT---YFPGKPTIRIAKFEP
      2040      2050      2060      2070      2080      2090

              1490      1500      1510      1520      1530      1540
PF11_0  NFCFEIAISEDNENNTHSVFLKSNQLKYTDNIQNDNTITKKIWSEYLGRNEFLE---
      :.  :...:..  :.  :.  :.  :...:..  :...:  :...:
632252  LFS---VISSKQRPRKFSI--KGS DGKYKYLKGHEDIRQDSLVMQLFGLVNTLLKNSD
      2100      2110      2120      2130      2140      2150

              1550      1560      1570      1580      1590
PF11_0  KILKRNISNILYECI--SRKHCLF-----LLEVLMMKINK----PTSYDNKVKGNFSY
      ...:~...  :...:  :  :.  :.  :...:..  .  :  .  .  :.  .  .
632252  ECFKRHLDIQQYPAIPLSPKSGLLGWVNSDTFHVLIREHRDAKKIPLNIEHWVMLQMAP
      2160      2170      2180      2190      2200      2210

              1600      1610      1620      1630      1640
PF11_0  FYFEYNIKVLCNSECIF----TNNHILHK-----NNTYSYKLPNNILSLLVFSKD
      :  :...:  .  :  .  :...  :.  :...  .  .  :...:..
632252  DY--ENLTLQKIEVFTYALDNTKGQDLYKILWLKSRSSSETWLERRTTYTRSLAVMSMTG
      2220      2230      2240      2250      2260

              1650      1660      1670
PF11_0  LIKG--KYHPENQI--NTTQKV-HFPLYPPFFVNINFYNEK
      :  :  :...:  .  .  :  :.  :.  :  :...:~
632252  YILGLGDRHPSNLMLDRITGKVIHIDFGDCF-EAAILREKYPEKVPFRLTRMLTYAMEVS
      2270      2280      2290      2300      2310      2320

```
